# Supplementary material
Source: publisher figshare collection journal article supplement (https://sage.figshare.com/articles/dataset/_/7745570)
Supplement: Supplementary file 1 [file 14413178]

## Primary Models Syntax

### 1. Intimacy

```
MIXED intimacyR WITH conf_agreedcb conf_agreedcwb Zexchangepartner Zpexchangepartner
Zcommunalpartner Zpcommunalpartner weekc partner partner2
/FIXED= weekc conf_agreedcb conf_agreedcwb Zexchangepartner Zpexchangepartner
Zcommunalpartner Zpcommunalpartner
Zexchangepartner*conf_agreedcb Zpexchangepartner*conf_agreedcb
Zexchangepartner*conf_agreedcwb Zpexchangepartner*conf_agreedcwb
Zcommunalpartner*conf_agreedcb Zpcommunalpartner*conf_agreedcb
Zcommunalpartner*conf_agreedcwb Zpcommunalpartner*conf_agreedcwb |SSTYPE(3)
/METHOD=REML
/PRINT=SOLUTION TESTCOV
/RANDOM= partner partner2 | subject(couple) COVTYPE(CS)
/RANDOM= partner*conf_agreedcwb partner2*conf_agreedcwb | subject(couple)
COVTYPE(CS)
/REPEATED = weekc | SUBJECT(couple*partner) COVTYPE(AR1).
```

### 2. Intimacy Controlling for Negative Evening Mood

```
MIXED intimacyR WITH conf_agreedcb conf_agreedcwb Zexchangepartner Zpexchangepartner
Zcommunalpartner Zpcommunalpartner pmnegmood weekc partner partner2
/FIXED= weekc pmnegmood conf_agreedcb conf_agreedcwb Zexchangepartner
Zpexchangepartner Zcommunalpartner Zpcommunalpartner
Zexchangepartner*conf_agreedcb Zpexchangepartner*conf_agreedcb
Zexchangepartner*conf_agreedcwb Zpexchangepartner*conf_agreedcwb
Zcommunalpartner*conf_agreedcb Zpcommunalpartner*conf_agreedcb
Zcommunalpartner*conf_agreedcwb Zpcommunalpartner*conf_agreedcwb |SSTYPE(3)
/METHOD=REML
/PRINT=SOLUTION TESTCOV
/RANDOM= partner partner2 | subject(couple) COVTYPE(CS)
/RANDOM= partner*conf_agreedcwb partner2*conf_agreedcwb | subject(couple)
COVTYPE(CS)
/REPEATED = weekc | SUBJECT(couple*partner) COVTYPE(AR1).
```

### 3. Negative Evening Mood

```
MIXED pmnegmood WITH conf_agreedcb conf_agreedcwb Zexchangepartner
Zpexchangepartner Zcommunalpartner Zpcommunalpartner weekc partner partner2
/FIXED= weekc conf_agreedcb conf_agreedcwb Zexchangepartner Zpexchangepartner
Zcommunalpartner Zpcommunalpartner
Zexchangepartner*conf_agreedcb Zpexchangepartner*conf_agreedcb
Zexchangepartner*conf_agreedcwb Zpexchangepartner*conf_agreedcwb
Zcommunalpartner*conf_agreedcb Zpcommunalpartner*conf_agreedcb
Zcommunalpartner*conf_agreedcwb Zpcommunalpartner*conf_agreedcwb |SSTYPE(3)
/METHOD=REML
```

```
/PRINT=SOLUTION TESTCOV  
/RANDOM= partner partner2 | subject(couple) COVTYPE(CS)  
/RANDOM= partner*conf_agreedcwb partner2*conf_agreedcwb | subject(couple)  
COVTYPE(CS)  
/REPEATED = weekc | SUBJECT(couple*partner) COVTYPE(AR1).
```

**Variable Key**

intimacyR = daily evaluations of intimacy with their partner

pmnegmood = daily evaluations of their negative evening mood

conf\_agreedcb = between-couple variance for conflicts agreed upon by both partners

conf\_agreedcwb = within-couple variance for conflicts agreed upon by both partners

Zexchangepartner = participant's Z-scored exchange orientation for exchanges with their partner

Zpexchangepartner = partner's Z-scored exchange orientation for exchanges with the participant

Zcommunalpartner = participant's Z-scored communal orientation for exchanges with their partner

Zcommunalpartner = partner's Z-scored communal orientation for exchanges with the participant

weekc = centered time scaled in weeks

partner/partner2 = binary variable indicating one partner or the other

couple = couple identification variable
